# Supplementary material
Source: MDPI journal article supplement (https://www.mdpi.com/2673-8783/1/1/1)
Supplement: s1 [file s1]

Supplemental Information:

### Pretreatment of Loblolly pine tree needles using deep eutectic solvents

Prathima Gujjula<sup>1</sup>, Narendra Kumar<sup>1</sup> Joan G. Lynam<sup>1\*</sup>

<sup>1</sup>*Department of Chemical Engineering, Louisiana Tech University, P.O. Box 10348, 600 Dan Reneau Drive, Ruston, LA 71272, USA*

\*Corresponding author. E-mail address: [lynam@latech.edu](mailto:lynam@latech.edu) (J. Lynam)

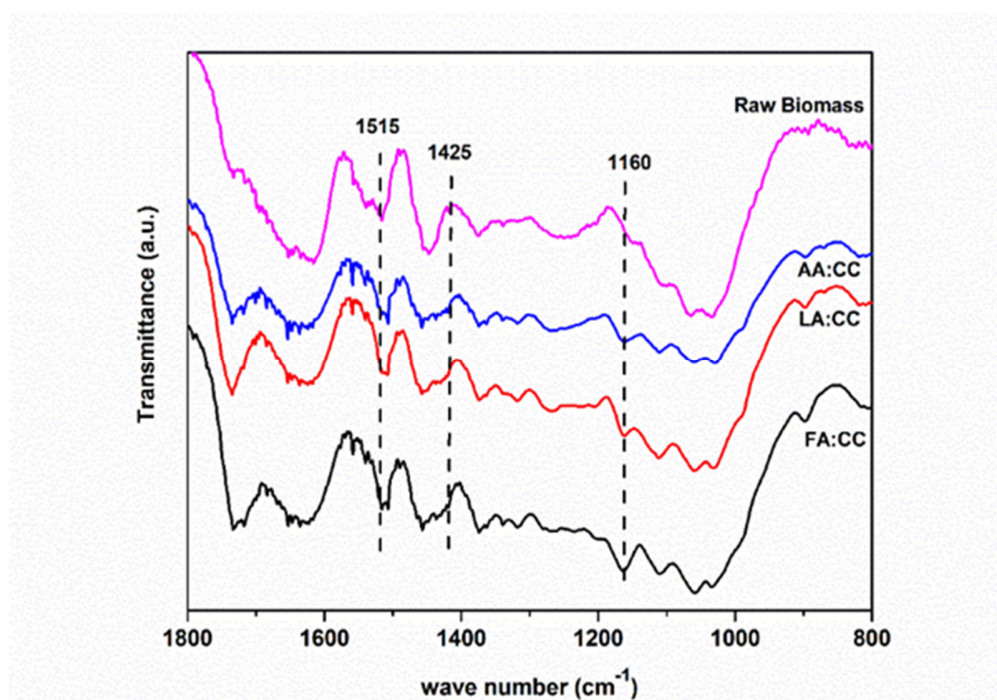

**Figure S1** FTIR transmission spectra of raw and FA:CC, LA:CC and AA:CC pretreated biomass
